# Supplementary material for: Porphyromonas gingivalis Strain Specific Interactions with Human Coronary Artery Endothelial Cells: A Comparative Study
Source: PLOS journal article supplement (doi:10.1371/journal.pone.0052606), 2012-12-26
Supplement: S2 (10.1371/journal.pone.0052606.s002) [file journal.pone.0052606.s002]

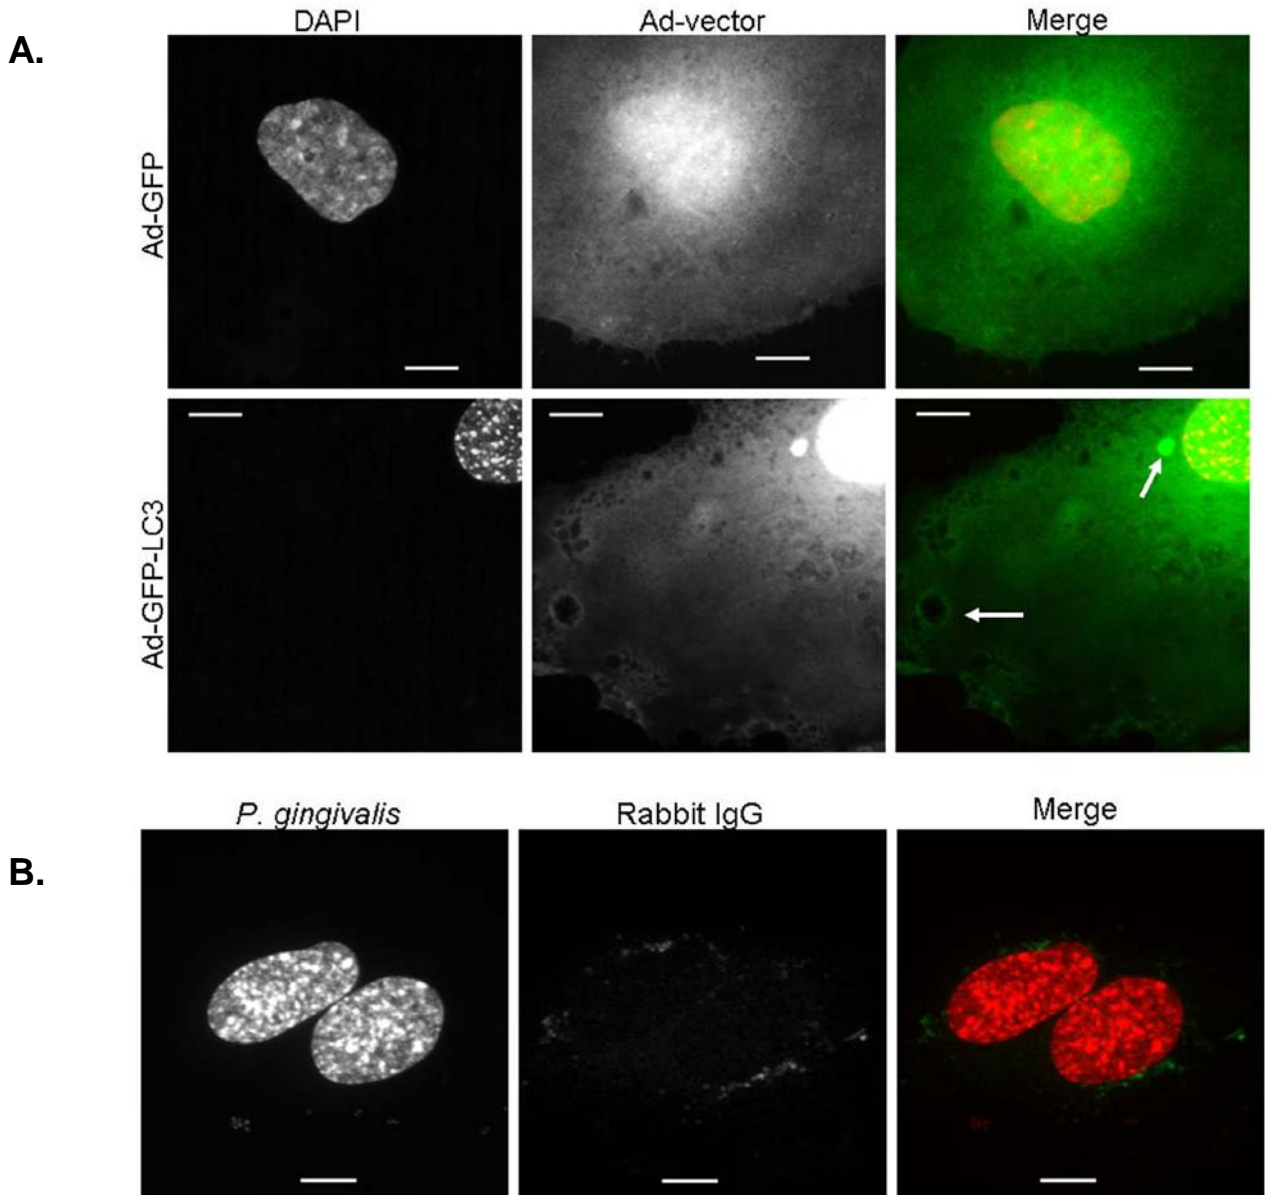

**Figure S2. Ad-GFP-LC3 vector (A) and LAMP-1 isotype (B) controls.**

**A)** HCAE cells were transduced with either Ad-GFP or AD-GFP-LC3 (MOI 10). At 48 hours post-transduction, cells were starved by incubating them in Krebs-Henseleit buffer. **B)** HCAE cells inoculated with *P. gingivalis* A7436. After 6 hours, cells were fixed with 4% paraformaldehyde dissolved in phosphate buffered saline (PBS) overnight at 4°C and processed as described in the methods section.
