# Supplementary material for: Porphyromonas gingivalis Strain Specific Interactions with Human Coronary Artery Endothelial Cells: A Comparative Study
Source: PLOS journal article supplement (doi:10.1371/journal.pone.0052606), 2012-12-26
Supplement: S3 (10.1371/journal.pone.0052606.s003) [file journal.pone.0052606.s003]

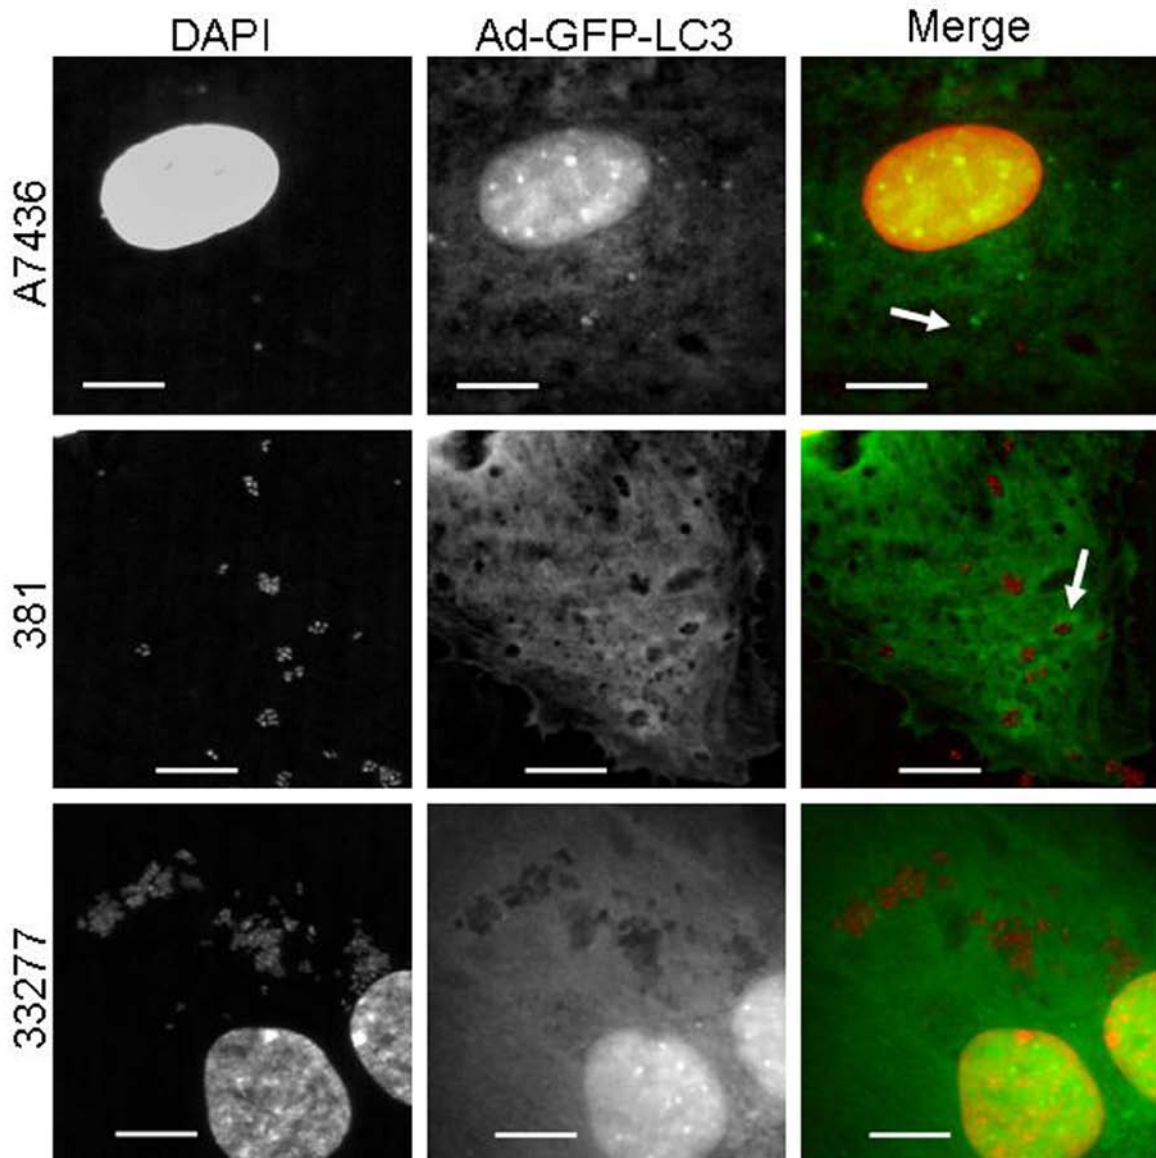

**Figure S3. Representative microscopic images of *P. gingivalis* strains A7436, 381, and 33277 within LC3 positive vacuoles.** Cells were processed at 6 hours post-inoculation. Arrows indicate bacteria within LC3 positive vacuoles. Scale bar is equivalent to 10  $\mu$ m.
