# Supplementary material for: Porphyromonas gingivalis Strain Specific Interactions with Human Coronary Artery Endothelial Cells: A Comparative Study
Source: PLOS journal article supplement (doi:10.1371/journal.pone.0052606), 2012-12-26
Supplement: S4 (10.1371/journal.pone.0052606.s004) [file journal.pone.0052606.s004]

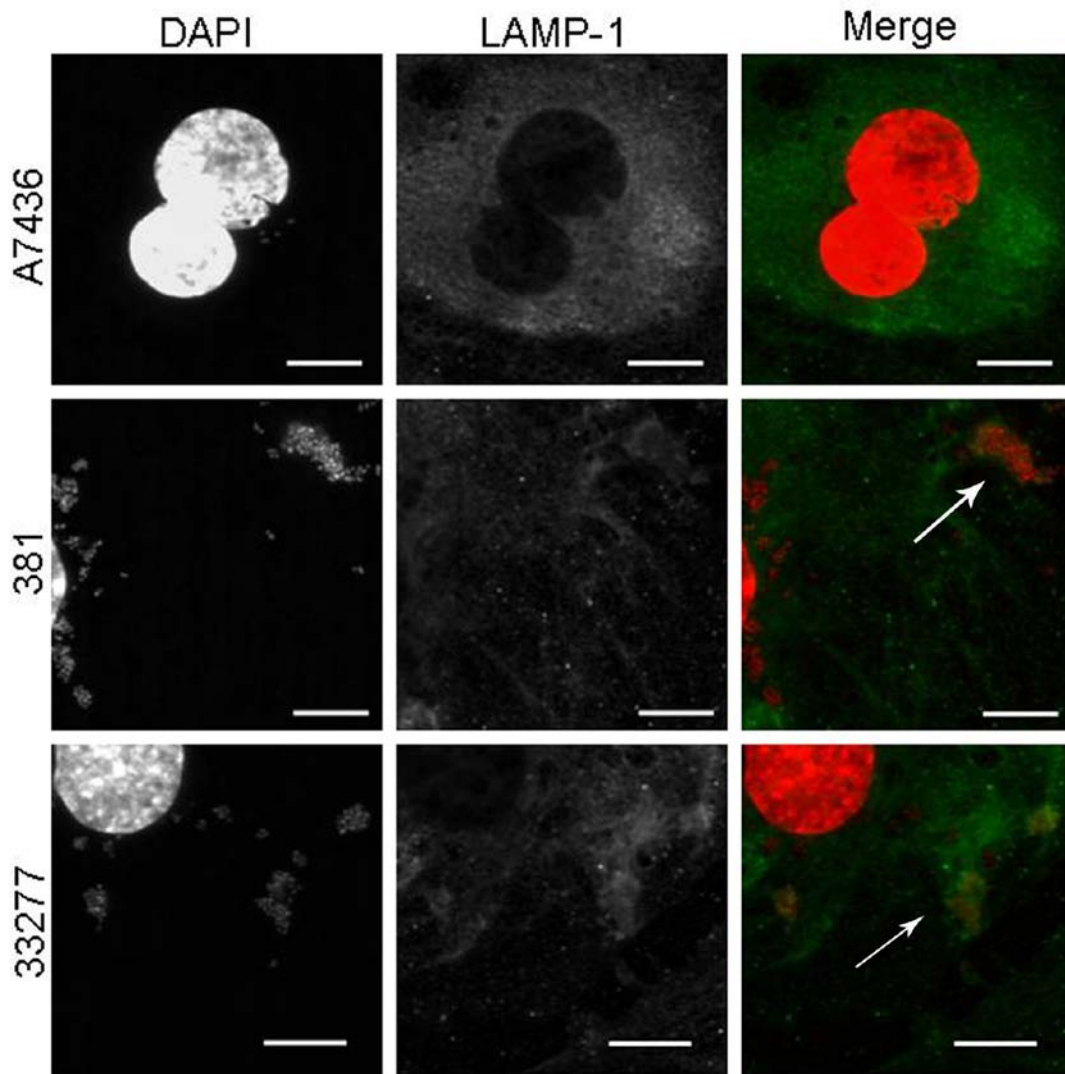

**Figure S4. Representative microscopic images of *P. gingivalis* strains A7436, 381, and 33277 within LAMP-1 positive vacuoles at 6 hours post-inoculation.** Arrows indicate bacteria within LAMP-1 positive vacuoles. Scale bar is equivalent to 10  $\mu$ m.
