# Supplementary material for: Porphyromonas gingivalis Strain Specific Interactions with Human Coronary Artery Endothelial Cells: A Comparative Study
Source: PLOS journal article supplement (doi:10.1371/journal.pone.0052606), 2012-12-26
Supplement: S5 (10.1371/journal.pone.0052606.s005) [file journal.pone.0052606.s005]

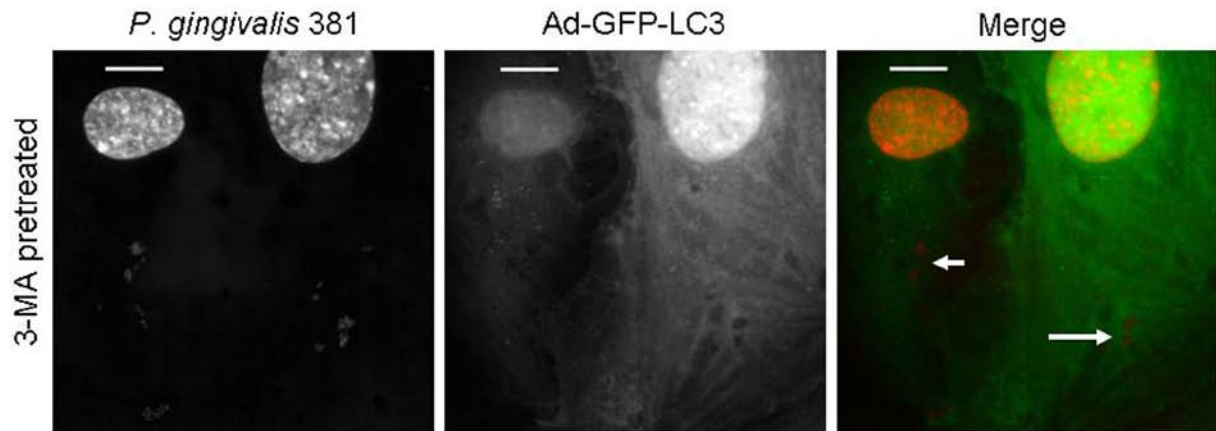

**Figure S5. Inhibition of autophagy with 3-MA.** At 48 hours post-transduction with Ad-GFP-LC3 (MOI 10), transduced cells infected were pre-treated with 10 mM 3-MA one hour prior to infection with *P. gingivalis* 381, which was added at an MOI of 100. Treatment with 3-MA was maintained in infected cultures until time of harvest (6 hours post inoculation). Harvested cells were processed and imaged as described in the methods section.
